# Supplementary material for: Zinc Binding to Tau Influences Aggregation Kinetics and Oligomer Distribution
Source: PubMed Central journal article supplement (PMC6928861; doi:10.3390/ijms20235979), 2019-11-27
Supplement: ijms-20-05979-s001.pdf [file ijms-20-05979-s001.pdf]

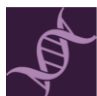

## Supplementary materials

**Table S1.** Determination of calcium and zinc binding stoichiometries to hTau441 from the analysis of the +18 peak multiplets (shown in Figure 1).

|                              | Molecular weight (Da) | Experimental molecular weight (Da) |
|------------------------------|-----------------------|------------------------------------|
| Apo hTau441                  | 45800                 | 45755 ( $\pm 0.002$ )              |
| hTau441 + 1 Ca <sup>2+</sup> | 45840                 | 45794 ( $\pm 0.002$ )              |
| hTau441 + 1 Zn <sup>2+</sup> | 45865                 | 45819 ( $\pm 0.001$ )              |
| hTau441 + 2 Zn <sup>2+</sup> | 45930                 | 45883 ( $\pm 0.003$ )              |
| hTau441 + 3 Zn <sup>2+</sup> | 45995                 | 45947 ( $\pm 0.002$ )              |
| hTau441 + 4 Zn <sup>2+</sup> | 46060                 | 46011 ( $\pm 0.001$ )              |

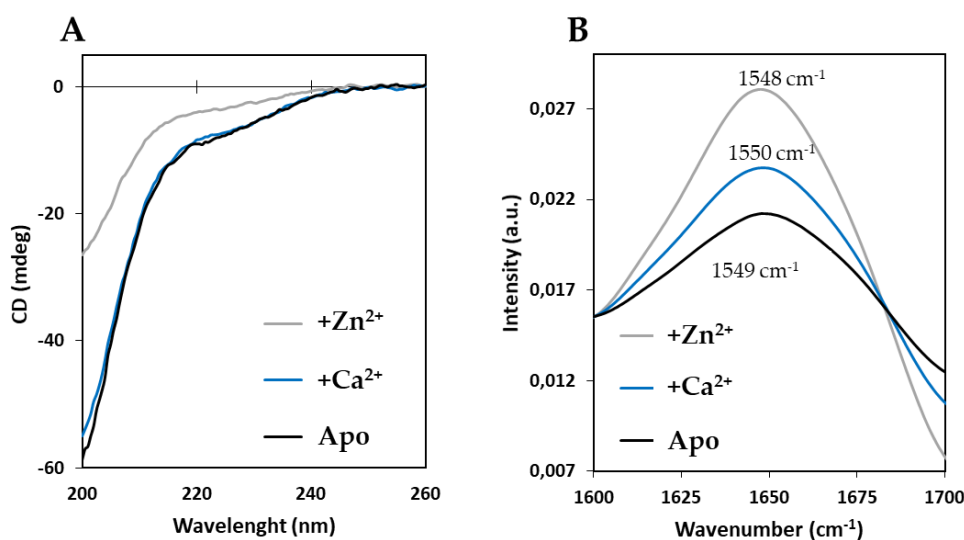

**Figure S1.** Metal ion binding to Tau does not change its structural conformation. **(A)** Circular dichroism spectra of 10  $\mu$ M Tau in the absence (black) or in the presence of 40  $\mu$ M CaCl<sub>2</sub> (blue) or 40  $\mu$ M ZnCl<sub>2</sub> (grey). **(B)** Attenuated total reflectance Fourier transform infrared spectra of 4  $\mu$ M Tau in absence (black) or in presence of 16  $\mu$ M CaCl<sub>2</sub> (blue) or 16  $\mu$ M ZnCl<sub>2</sub> (grey). Measurements were performed after 1 h of incubation at 4 °C.
